# Supplementary material for: Testing Phylogenetic Hypotheses of the Subgenera of the Freshwater Crayfish Genus Cambarus (Decapoda: Cambaridae)
Source: PLoS One. 2012 Sep 26;7(9):e46105. doi: 10.1371/journal.pone.0046105 (PMC3458831; doi:10.1371/journal.pone.0046105)
Supplement: Appendix S2 — Table including the distribution of each species by US state and habitat of each species taken from Fetzner [10] and Hobbs [2]. (XLS) [file pone.0046105.s002.xls]

## Sheet: Sheet1
Appendix S2.
Taxa	Habbitat	Range
Aviticambarus
Cambarus hamulatus (Cope, 1881)	Cave	USA: AL, TN
Cambarus jonesi Hobbs and Barr, 1960	Cave	USA: AL
Cambarus laconensis Buhay and Crandall, 2009	Cave	USA:AL
Cambarus pecki (Hobbs, 1976)	Cave	USA: AL
Cambarus speleocoopi Buhay and Crandall, 2009	Cave	USA:AL
Cambarus
Cambarus bartonii bartonii (Fabricius, 1798)	Stream	USA: AL, CT, DC, DE, GA, KY, MA, MD, NC, NJ, NY, PA, RI, SC, TN, VA, VT, WV Canada: NB, ON, QC
Cambarus carinirostris Hay, 1914	Stream	USA: OH, WV
Cambarus davidi Cooper, 2000	Stream	USA: NC
Cambarus howardi Hobbs and Hall, 1969	Stream	USA: AL, GA
Cambarus sciotensis Rhoades, 1944	Stream	USA: OH, VA, WV
Depressicambarus
Cambarus deweesae Bouchard and Etnier, 1979	Burrow	USA: TN
Cambarus englishi Hobbs and Hall, 1972	Stream	USA: AL, GA
Cambarus graysoni Faxon, 1914	Stream	USA: AL, KY, TN
Cambarus halli Hobbs, 1968	Stream	USA: AL, GA
Cambarus harti Hobbs, 1981	Burrow	USA: GA
Cambarus latimanus (Le Conte, 1856)	Burrow/Stream	USA: AL, FL, GA, NC, SC, TN
Cambarus obstipus Hall, 1959	Stream	USA: FL
Cambarus pyronotus Bouchard, 1978	Burrow	USA: GA, SC
Cambarus reflexus Hobbs, 1981	Burrow	USA: AL, FL, GA, KY, MS, SC, TN
Cambarus striatus 1 Hay, 1902	Burrow	USA: AL, FL, GA, KY, MS, SC, TN
Cambarus striatus 2	Burrow
Cambarus striatus 3	Burrow
Cambarus striatus 4	Burrow
Cambarus strigosus Hobbs, 1981	Burrow	USA: GA
Cambarus truncatus Hobbs, 1981	Burrow	USA: GA
Erebicambarus
Cambarus hubbsi Creaser, 1931	Burrow/Cave/Stream	USA: AR, MO
Cambarus hubrichti Hobbs, 1952	Cave	USA: MO
Cambarus maculatus Hobbs, 1988	Stream	USA: MO
Cambarus rusticiformis Rhoades, 1944	Stream	USA: KY, TN
Cambarus tenebrosus Hay, 1902	Cave/Stream	AL, IL, KY, TN
Exilicambarus
Cambarus cracens Bouchard and Hobbs, 1976	Stream	USA: AL
Glareocola
Cambarus brachydactylus Hobbs, 1953	Stream	USA: TN
Cambarus friaufi Hobbs, 1954	Stream	USA: TN
Cambarus williami Bouchard and Bouchard, 1995	Stream	USA: TN
Appendix S2. continued
Taxa	Habbitat	Range
Hiaticambarus
Cambarus chasmodactylus James, 1966	Stream	USA: NC, VA, WV
Cambarus coosawattae Hobbs, 1981	Stream	USA: GA
Cambarus fasciatus Hobbs, 1981	Stream	USA: GA
Cambarus girardianus Faxon, 1884	Stream	USA: AL, GA, TN
Cambarus longirostris Faxon, 1884	Stream	USA: GA, NC, SC, TN, VA
Cambarus longulus Girard, 1852	Stream	USA: NC, VA, WV
Cambarus manningi Hobbs, 1981	Stream	USA: AL, GA, TN
Cambarus speciosus Hobbs, 1969	Stream	USA: GA
Table 3. continued Taxa
Jugicambarus
Cambarus aculabrum Hobbs and Brown, 1987	Cave	USA: AR
Cambarus asperimanus Faxon, 1914	Stream	USA: GA, NC, SC, TN
Cambarus batchi Schuster, 1973	Burrow	USA: KY
Cambarus bouchardi Hobbs, 1970	Stream	USA: TN
Cambarus causeyi Reimer, 1966	Stream	USA: AR
Cambarus crinipes Bouchard, 1973	Stream	USA: KY, TN
Cambarus cryptodytes Hobbs, 1941	Cave	USA: FL, GA
Cambarus distans Rhoades, 1944	Stream	USA: AL, GA, KY, TN
Cambarus dubius Faxon, 1884	Burrow	USA: KY, MD, NC, PA, TN, VA, WV
Cambarus gentryi Hobbs, 1970	Burrow	USA: TN
Cambarus monongalensis Ortmann, 1905	Burrow	USA: PA, VA, WV
Cambarus obeyensis Hobbs and Shoup, 1947	Burrow/Stream	USA: TN
Cambarus setosus Faxon, 1889	Cave	USA: MO, OK
Cambarus tartarus Hobbs and Coope, 1972	Cave	USA: OK
Cambarus tuckasegee Cooper and Schofield, 2002	Stream	USA: NC
Cambarus unestami Hobbs and Hall, 1969	Stream	USA: AL, GA
Lacunicambarus
Cambarus diogenes 1 Girard, 1852	Burrow	USA: OH, AL, AR, CO, DC, DE, FL, GA, IA, IL, IN, KS, KY, LA, MD, MI, MN, MO, MS, NC, ND, NE, NJ, OH, OK, PA, SC, SD, TN, TX, VA, WI, WV
Cambarus diogenes 2	Burrow
Cambarus diogenes 3	Burrow
Cambarus diogenes 4	Burrow
Cambarus diogenes 5	Burrow
Cambarus diogenes 6	Burrow
Cambarus diogenes 7	Burrow
Cambarus ludovicianus Faxon, 1884	Burrow	USA: AR, LA, MS, TN, TX
Cambarus miltus Fitzpatrick, 1978	Burrow	USA: AL, FL
Appendix S2. continued
Taxa	Habbitat	Range
Puncticambarus
Cambarus acuminatus Faxon, 1884	Stream	USA: MD, NC, SC, VA
Cambarus coosae Hobbs, 1981	Stream	USA: AL, GA, TN
Cambarus cumberlandensis Hobbs and Bouchard, 1973	Stream	USA: KY, TN
Cambarus georgiae Hobbs, 1981	Stream	USA: GA, NC
Cambarus hiwasseensis Hobbs, 1981	Stream	USA: GA, NC
Cambarus hobbsorum Cooper, 2001	Stream	USA: NC
Cambarus nerterius Hobbs, 1964	Cave	USA: WV
Cambarus parrishi Hobbs, 1981	Stream	USA: GA, NC
Cambarus reburrus Prins, 1968	Stream	USA: NC
Cambarus robustus Girard, 1852	Stream	USA: CT, IL, IN, KY, MI, NC, NY, OH, PA, TN, VA, WV Canada: ON
Cambarus scotti Hobbs, 1981	Stream	USA: AL, GA
Tubericambarus
Cambarus acanthura Hobbs, 1981	Burrow/Stream	USA: AL, GA, NC, TN
Veticambarus
Cambarus pristinus Hobbs, 1965	Stream	USA: TN
